# Effects of Short-Term Glucocorticoids on Cardiovascular Biomarkers

Daniel J. Brotman, John P. Girod, Mario J. Garcia, Jeetesh V. Patel, Manjula Gupta, Amy Posch, Sue Saunders, Gregory Y. H. Lip, Sarah Worley, and Sethu Reddy

Departments of General Internal Medicine (D.J.B., J.P.G., S.S.), Cardiovascular Medicine (M.J.G.), Endocrinology, Diabetes, and Metabolism (M.G., A.P., S.R.), and Biostatistics and Epidemiology (S.W.), Cleveland Clinic Foundation, Cleveland, Ohio 44195; Department of Cardiology (J.P.G.), University of Pittsburgh Medical Center, Pittsburgh, Pennsylvania 15203; and Haemostasis Thrombosis and Vascular Biology Unit (J.V.P., G.Y.H.L.), University Department of Medicine, City Hospital, Birmingham B18 7QH, United Kingdom

**Context:** Glucocorticoids are known to acutely increase blood pressure, suppress inflammation, and precipitate insulin resistance. However, the short-term effects of glucocorticoids on other cardiovascular risk factors remain incompletely characterized.

**Objective:** Our objective was to determine the effects of a short course of dexamethasone on multiple cardiovascular biomarkers and to determine whether suppression of morning cortisol in response to low-dose dexamethasone is correlated with cardiovascular risk markers in healthy volunteers.

**Design:** We conducted a randomized, double-blind, placebo-controlled study.

**Setting:** The study took place in a tertiary care hospital. Study subjects: Twenty-five healthy male volunteers, ages 19–39 yr, participated in the study.

**Intervention:** Subjects received either 3 mg dexamethasone twice daily or placebo for 5 d. Subjects also underwent a low-dose (0.5 mg) overnight dexamethasone suppression test.

**Measures:** Parameters examined before and after the 5-d interven-

tion included heart rate, blood pressure, weight, fasting lipid variables, homocysteine, renin, aldosterone, insulin resistance (homeostasis model assessment), high-sensitivity C-reactive protein, B-type natriuretic peptide, flow-mediated and nitroglycerin-mediated brachial artery dilatation, and heart rate recovery after exercise. All measurements were done in the morning hours in the fasting state.

**Results:** Dexamethasone increased systolic blood pressure, weight, B-type natriuretic peptide, and high-density-lipoprotein-cholesterol. Dexamethasone decreased resting heart rate, high-sensitivity C-reactive protein, and aldosterone and tended to attenuate nitroglycerin-mediated vasodilatation. There was no effect on flow-mediated vasodilatation, diastolic blood pressure, triglycerides, low-density-lipoprotein-cholesterol, nonesterified fatty acids, homocysteine, or heart rate recovery. The response of circulating cortisol to low-dose dexamethasone had no significant correlation with any of the cardiovascular risk markers.

**Conclusions:** Short-term glucocorticoids elicits both favorable and unfavorable effects on different cardiovascular risk factors. Manipulation of specific glucocorticoid-responsive physiological pathways deserves further study. (*J Clin Endocrinol Metab* 90: 3202–3208, 2005)

THE HYPOTHALAMIC-PITUITARY-ADRENAL (HPA) axis is vital for survival in stressful situations such as hemorrhage and sepsis (1). Glucocorticoid deficiency can result in hypotension, weight loss, hypoglycemia, and death, especially in the setting of stress (2). Conversely, exogenous or endogenous glucocorticoid excess can contribute to the development of hypertension, insulin resistance, hyperglycemia, weight gain, hyperhomocysteinemia, and atherosclerosis (3–6). Although epidemiological studies and animal studies suggest accelerated atherosclerosis in the presence of long-term excessive exogenous glucocorticoid exposure (7–9), the extent of inflammation confounds the relationship between glucocorticoid exposure and the atherosclerosis associated with inflammatory diseases (10). In recent years, a

growing body of literature suggests that altered endogenous glucocorticoid homeostasis may contribute to the metabolic syndrome and adverse cardiovascular outcomes (11–18), whereas other studies have suggested salutary effects of glucocorticoids on the cardiovascular system (19).

Limited *in vivo* data are available to characterize the effects of glucocorticoids on specific cardiovascular risk factors, except for hypertension and glucose homeostasis, and, with long-term exposure, body fat redistribution. Furthermore, central adiposity resulting from long-term glucocorticoid exposure, rather than glucocorticoids *per se*, may lead to many adverse cardiovascular effects, complicating the assessment of direct glucocorticoid effects on these risk factors (4). Another issue that confounds the evaluation of glucocorticoid-specific regulation of cardiovascular risk factors is that most glucocorticoids used in clinical medicine, such as prednisone, hydrocortisone, and methylprednisolone, have substantial mineralocorticoid effects when used in pharmacological doses. As such, physiological studies using high doses of these agents are, in effect, examining the combined effects of glucocorticoids and mineralocorticoids (8, 20–28).

Based on these limitations of existing literature, we sought

First Published Online March 15, 2005

Abbreviations: BNP, Brain natriuretic peptide; CRP, C-reactive protein; HDL, high-density lipoprotein; HOMA, homeostasis assessment model; HPA, hypothalamic-pituitary-adrenal; LDL, low-density lipoprotein.

JCEM is published monthly by The Endocrine Society (<http://www.endo-society.org>), the foremost professional society serving the endocrine community.

to determine the specific short-term effects of glucocorticoids on cardiovascular biomarkers in healthy volunteers in whom active inflammatory diseases were absent. We used dexamethasone because it has negligible mineralocorticoid effects (29, 30), and we chose a dose of dexamethasone that would be comparable to maximal stress-induced endogenous hydrocortisone production (such as seen in sepsis), approximately 150- to 300-mg hydrocortisone equivalents daily (31, 32). We hypothesized that insulin resistance induced by dexamethasone would adversely affect endothelial function, lipid parameters (particularly triglycerides and nonesterified fatty acids), B-type natriuretic peptide (BNP), and heart rate recovery after exercise. We also sought to determine whether dexamethasone would affect C-reactive protein (CRP) in healthy subjects (with low baseline CRP values), given that glucocorticoids directly stimulate hepatic CRP production (33) while simultaneously suppressing inflammation. We were concerned with the direction of change in these parameters (increase *vs.* decrease) and not with the magnitude of the changes from baseline, which would be affected primarily by the dose and duration of treatment defined by the protocol.

Based on preliminary work by others (14, 34), we also sought to relate these risk markers to the tone of the HPA axis, measured by low-dose dexamethasone suppression testing, to attempt to validate the hypothesis that subtly impaired suppression of endogenous cortisol is related to the metabolic syndrome. We hypothesized that features of the metabolic syndrome, including high waist-to-hip ratio, high body mass index, blood pressure, the ratio of triglyceride to high-density lipoprotein (HDL)-cholesterol, insulin resistance, and endothelial dysfunction, would be negatively correlated with the magnitude of the decrease in circulating cortisol in response to low-dose dexamethasone.

## Subjects and Methods

### Study design

We conducted a randomized, double-blind, placebo-controlled study in healthy young men. Subjects were treated with 3 mg dexamethasone twice daily for 5 d or with placebo. Multiple physiological markers were assessed before and after the intervention. Additionally, we conducted a low-dose dexamethasone test before the pharmacological intervention; all subjects received 0.5 mg dexamethasone at bedtime (2300 h) followed by assessment of plasma cortisol the following morning at 0800 h.

### Subjects

We recruited healthy nonsmoking men, ages 19–39 yr, by local advertisements; volunteers were given a stipend for participation. Potential subjects were excluded if they had any of the following: ongoing medical or psychiatric illnesses, regular use of prescription or nonprescription medications, illicit drug use or excessive alcohol use, surgery or hospitalization in the preceding 3 months, exposure to exogenous glucocorticoids in the preceding year, or nontraditional sleep/wake habits (*e.g.* night-shift work or frequent travel across time zones). Subjects underwent a full history and physical examination, including measurement of height, weight, and waist and hip circumferences. Subjects were advised to maintain their usual sleep-wake schedule, exercise, and dietary habits during the study and to report any changes in their health status or perceived adverse effects of study participation. A structured poststudy questionnaire allowed the subjects to report perceived effects of the study medication on health-related behaviors. Subjects were advised not to take any prescription medications, over-the-counter medications, or alcohol during the protocol. All subjects provided written

informed consent. The Cleveland Clinic Foundation Institutional Review Board approved the protocol.

### Randomization and blinding

Subjects were randomized by computer to receive dexamethasone or placebo. Investigators and subjects were unaware of treatment assignments. At study completion, all subjects were asked to report whether they believed they received dexamethasone or placebo. Compliance was confirmed by measuring posttreatment cortisol levels (expected to be undetectable in all subjects assigned to dexamethasone). Prospective power analysis indicated that 12 subjects per group would provide 80% power to detect a difference of at least 1.2 sd in the mean change from baseline between the placebo and dexamethasone groups, assuming unequal group variances. At this sample size, we had 80% power to detect a mean change from baseline within each group of at least 0.9 sd and over 80% power to detect Pearson correlation coefficients between continuous measures of at least 0.50 ( $r^2$  at least 0.25).

### Laboratory data

Fasting 0800-h blood samples were obtained before and after the 5-d intervention. All samples were promptly centrifuged and stored at  $-70^{\circ}\text{C}$  for batch analysis. Plasma BNP was assayed using an automated two-site sandwich immunoassay using direct chemiluminescence (ADVIA Centaur; Bayer Healthcare, Newbury, UK). Serum high-sensitivity CRP was assayed using an immunoturbidometric assay (Modular Analytics; Roche Diagnostics, Indianapolis, IN). Serum triglycerides, total cholesterol, and direct low-density lipoprotein (LDL)-cholesterol were determined enzymatically (Modular Analytics), and HDL-cholesterol was determined using the Friedewald formula. Insulin levels were determined using an enzyme immunoassay (AIA NexIA; Tosoh Bioscience, South San Francisco, CA). Cortisol was measured using a chemiluminometric immunoassay (AIA NexIA). Enzyme colorimetry (WAKO; Alpha Laboratories, Hampshire, UK) was used to determine serum nonesterified fatty acid concentrations. Glucose was measured with an automated oxidation assay (Modular Analytics). Plasma aldosterone was measured by RIA (Diagnostic Products Corp., Los Angeles, CA). Plasma renin was measured as direct active renin by a monoclonal antibody-based two-site immunochemiluminometric assay on the automated Nichols Advantage System (Nichols Diagnostics, San Juan Capistrano, CA). The assay is calibrated against the international reference preparation distributed by the World Health Organization (WHO IRP 68/356), and results are expressed as mU/liter. Both inter- and intra-assay variations were well under 8%, and the assay has a functional sensitivity of 0.8 mU/liter. The homeostasis model assessment (HOMA) was used to determine insulin resistance, calculated as  $[\text{fasting insulin } (\mu\text{U/ml})] \times [\text{fasting glucose } (\text{mmol/liter})]/22.5$  (35).

### Blood pressure, heart rate, and weight

Blood pressure and heart rate were determined in triplicate in a rested sitting position using a single automated cuff (DINAMAP); the mean value of the three measurements of diastolic blood pressure, systolic blood pressure, and pulse rate were used in data analysis. Heart rate was also determined while supine, after quietly resting for 15 min. Weight and height were determined manually using a single balance scale.

### Brachial artery reactivity

Endothelium-dependent vasodilatation was assessed noninvasively using a 13-MHz harmonic imaging transducer (Acuson Sequoia, Mountain View, CA). Two-dimensional and Doppler flow images of the brachial artery were digitally stored in cine-loop DICOM format and transferred to a workstation for off-line analysis (ProSolv Cardiovascular version 3.0, Indianapolis, IN). A blinded investigator measured the brachial artery diameter before and after proximal arterial occlusion. Transient arterial occlusion was accomplished using a blood pressure cuff placed 4 cm above the antecubital crease and inflated to 180 mm Hg for 5 min and then rapidly deflated. Anatomic landmarks were used to maintain consistent positioning of the probe. Flow-mediated vasodilatation was defined as the percent increase in arterial diameter in response to this ischemic stressor. After a 15-min supine resting period,

non-endothelium-mediated vasodilatation was assessed in a similar fashion in response to a single 0.4-mg dose of sublingual nitroglycerin.

### Heart rate recovery

Subjects underwent a standard Bruce treadmill protocol. To ensure that each subject exercised for the same amount of time (and reached the same workload) before and after the intervention, we did not exercise subjects to exhaustion. Instead, during the index study, subjects exercised 1 min beyond achieving 90% of their age-predicted maximum heart rate (220 beats/min minus age in years) (36). Subjects exercised for an identical duration of time during the postintervention assessment, regardless of heart rate. Heart rate recovery was defined as the peak heart rate (at the termination of exercise) minus the heart rate 1 min into the recovery phase of the Bruce protocol (37). This parameter is considered an index of parasympathetic reactivation after exertion (38).

### Statistical analysis

We computed the change from baseline to post intervention in each measured variable; variables with highly skewed distributions were log-transformed before this calculation. We compared the placebo and dexamethasone groups on change from baseline using two-sample unequal variance *t* tests. As a secondary analysis, we assessed whether the mean change from baseline within the dexamethasone group was equal to zero using one-sample *t* tests. We assessed the relationships among continuous variables using Pearson correlation coefficients. All tests were two-tailed and performed at a significance level of 0.05. Statistical analyses were performed using JMP 5.1 (SAS Institute, Cary, NC).

## Results

### Subjects, randomization, and protocol completion

Twenty-five subjects were enrolled in the protocol; 13 were randomized to receive dexamethasone and 12 to placebo. All subjects completed the protocol, and compliance was confirmed in all 13 dexamethasone-treated subjects via undetectable postintervention serum cortisol. Brachial artery reactivity data were incomplete for two subjects, one in each group; one subject refused to take nitroglycerin during the postintervention assessment because of a headache during the baseline study, and technical difficulties affected the data for the other subject.

### Unblinding and self-reported effects of the intervention

In the structured postintervention survey, three subjects in each group believed they had received the active drug; seven dexamethasone-treated subjects and four placebo-treated subjects believed they had received placebo. The remaining eight subjects were unsure. Nineteen of the subjects reported no change whatsoever in sleeping, eating, and exercise behaviors; the other six subjects reported minor changes in one or more of these behaviors. Increased appetite was reported in two dexamethasone-treated subjects and one placebo-treated subject ( $P > 0.99$ ).

### Effects of the intervention on cardiovascular risk markers (Fig. 1)

The baseline values of the various measured parameters are shown in Table 1; the effects of the intervention are also presented in Table 1. Among subjects treated with dexamethasone, the change in BNP was not significantly correlated with the change in systolic blood pressure ( $r^2 = 0.01$ ;  $P = 0.72$ ), suggesting that increased afterload alone did not account for the change in BNP. Similarly, the change in

systolic blood pressure was not significantly related to the change in supine heart rate ( $r^2 = 0.05$ ;  $P = 0.26$ ) or sitting heart rate ( $r^2 = 0.01$ ;  $P = 0.70$ ).

### Brachial artery reactivity

As shown in Table 1, flow-mediated vasodilatation was similar in dexamethasone- and placebo-treated subjects, suggesting that short-term dexamethasone did not significantly impair endothelial function.

### Low-dose dexamethasone testing

We examined correlations between the absolute change in cortisol from baseline and the various cardiovascular biomarkers. We also examined correlations between each biomarker and the percent decrement of cortisol from baseline. We found no significant correlations between the responsiveness of the HPA axis to low-dose dexamethasone and any of the metabolic-syndrome-associated parameters. Correlation coefficients between specific biomarkers and the absolute change in morning cortisol after 0.5 mg dexamethasone (our hypothesized index of HPA-axis tone) are shown in Table 2. Also shown are the correlation coefficients between baseline cortisol levels and absolute postdexamethasone cortisol levels.

## Discussion

Our data suggest that glucocorticoids acutely decrease resting heart rate, increase circulating BNP, lower CRP, and increase HDL-cholesterol without affecting LDL-cholesterol, free fatty acids, or triglycerides. These changes occurred in the setting of a marked increase in insulin secretion but no significant change in circulating glucose levels. We did not find any evidence that short-term glucocorticoids adversely affect endothelial function. Before we address some key differences between our findings and those of other researchers, it is important to recognize that we used a drug (dexamethasone) with negligible mineralocorticoid activity (29, 30) that suppresses endogenous cortisol (which has substantial mineralocorticoid activity). Therefore, it is conceivable that some of the effects we observed might have been mediated in part by decreased mineralocorticoid activity rather than glucocorticoid effects *per se*. In keeping with this, we did observe a significant reduction in aldosterone concentrations in the dexamethasone-treated subjects. Nevertheless, given the well-characterized adverse cardiovascular effects of mineralocorticoids (39), we believe that the use of dexamethasone is a major strength of our study. Indeed, other researchers who attempted to examine the effects of glucocorticoids on cardiovascular risk factors may have unknowingly generated findings that were mediated in part by mineralocorticoid effects of the drugs they chose (such as hydrocortisone and prednisone) (8, 20–28).

Several of our findings deserve comment. Our intervention demonstrates that hyperinsulinemia *per se*, induced by a short course of glucocorticoids, does not invariably lead to the lipid changes typically associated with insulin resistance (high triglycerides, raised nonesterified fatty acids, and low HDL). Rather, glucocorticoids promote insulin secretion,

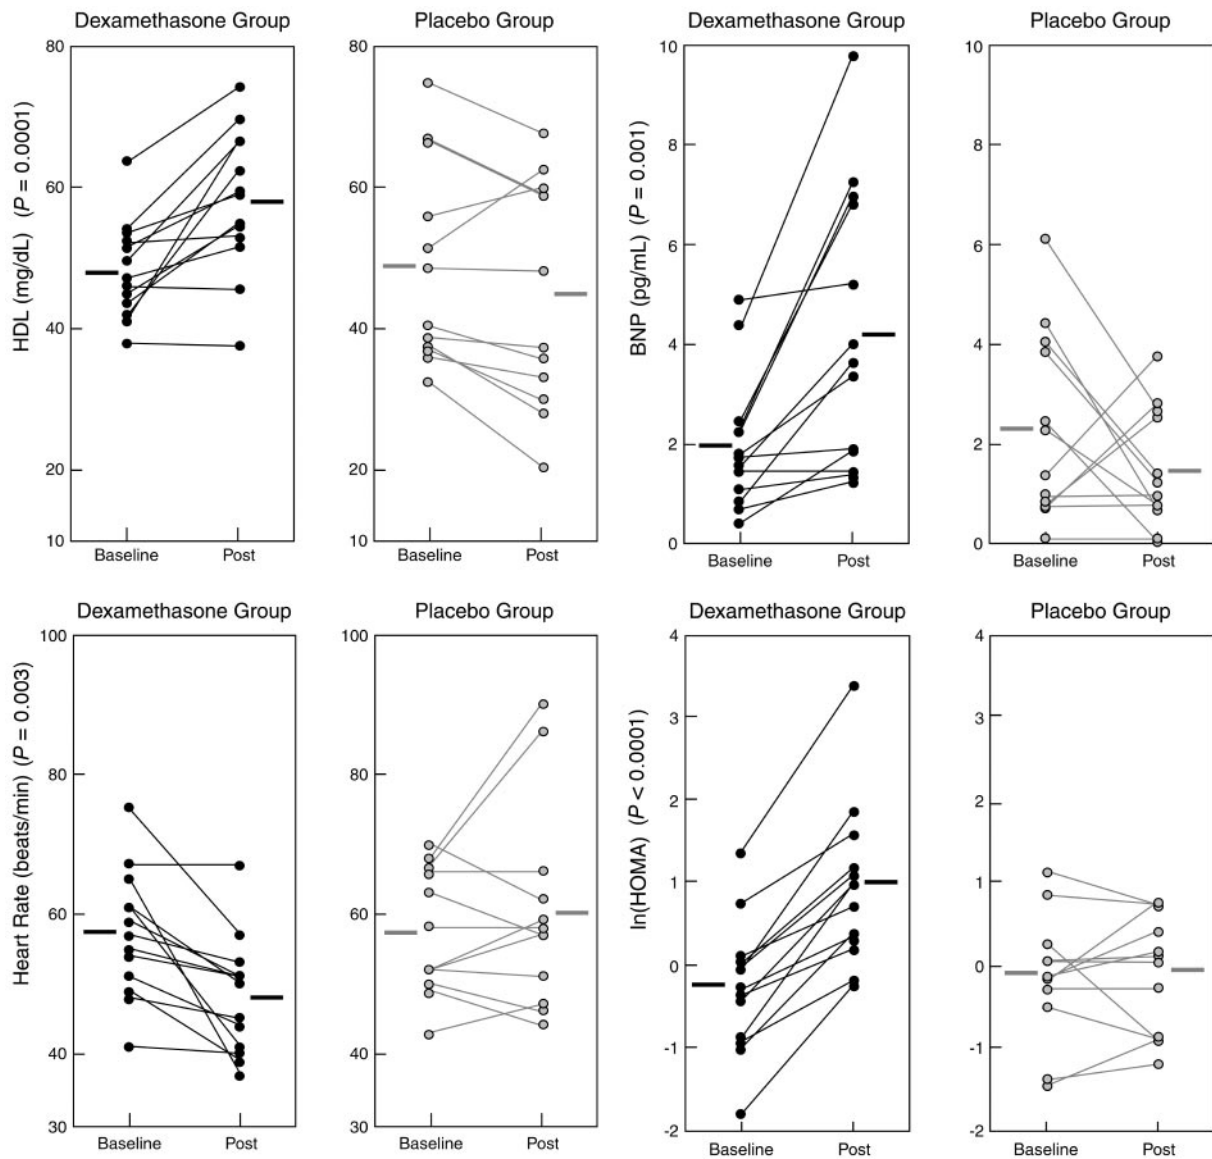

FIG. 1. Dexamethasone-mediated changes in selected cardiovascular biomarkers. The *P* values are for two-sided intergroup comparisons. Means are shown by the *horizontal lines* in the figure margins.

which at the level of the liver is likely to limit the action of hepatic lipase, decreasing HDL catabolism (40). Our lipid findings are consistent with one small, nonrandomized study of prednisone-treated patients with systemic inflammatory diseases (20) but differ from other nonrandomized reports that corticosteroid treatment raises triglycerides and LDL (21, 41). The placebo-controlled nature of our study, the short duration of treatment, and the use of healthy volunteers (rather than patients with inflammatory diseases) may explain the differences between our findings and those of other researchers. Additionally, the mineralocorticoid effects of the steroids used in these other studies may have affected lipid parameters, given the known metabolic effects of drugs affecting the renin-angiotensin-aldosterone system (42, 43).

In our subjects, hyperinsulinemia *per se* did not increase sympathetic-parasympathetic balance (based on heart rate measurements). In contrast, the hyperinsulinemia induced

by dexamethasone was associated with decreased heart rate at rest and no change in heart rate recovery after exercise. Although hyperinsulinemia during a euglycemic clamp is associated with increased sympathetic tone (44), it is possible that this is caused in part by depletion of other circulating substrates from the circulation, such as fatty acids, protein or potassium, rather than from hyperinsulinemia itself. Alternatively, it may be that dexamethasone is capable of reducing sympathetic tone in the face of hyperinsulinemia. Although the mechanism for this finding is uncertain, it is possible that suppression of CRH by dexamethasone attenuated sympathetic nervous system activity (45) or that increased blood pressure elicited a reflex inhibition of sympathetic tone. Because change in blood pressure was not significantly correlated with decrease in heart rate, this latter mechanism may be less likely but remains possible. Regardless of the mechanism, a reduction in central sympathetic tone may explain

**TABLE 1.** Effects of dexamethasone treatment on cardiovascular biomarkers

| Parameter                                  | Mean (SD) baseline value |                  | Mean (SD) change from baseline |                  | <i>P</i> values for dexamethasone-mediated change from baseline <sup>a</sup> |                           |
|--------------------------------------------|--------------------------|------------------|--------------------------------|------------------|------------------------------------------------------------------------------|---------------------------|
|                                            | Dexamethasone (n = 13)   | Placebo (n = 12) | Dexamethasone (n = 13)         | Placebo (n = 12) | Between groups                                                               | Within group <sup>b</sup> |
| Age (yr)                                   | 23.5 (5.4)               | 24.9 (5.6)       | N/A                            | N/A              | N/A                                                                          | N/A                       |
| Anthropometric measures                    |                          |                  |                                |                  |                                                                              |                           |
| Weight (kg)                                | 79.6 (13.6)              | 72.1 (13.0)      | +1.3 (1.5)                     | −0.02 (0.7)      | 0.008                                                                        | 0.006                     |
| Height (cm)                                | 178.1 (9.1)              | 177.4 (7.4)      | N/A                            | N/A              | N/A                                                                          | N/A                       |
| Body mass index (kg/m <sup>2</sup> )       | 25.0 (3.3)               | 22.9 (3.6)       | N/A                            | N/A              | N/A                                                                          | N/A                       |
| Waist-to-hip ratio                         | 0.90 (0.09)              | 0.87 (0.06)      | N/A                            | N/A              | N/A                                                                          | N/A                       |
| Heart rate (beats/min)                     |                          |                  |                                |                  |                                                                              |                           |
| Supine                                     | 57.2 (9.0)               | 57.5 (9.0)       | −9.0 (8.4)                     | +2.8 (9.5)       | 0.003                                                                        | 0.002                     |
| Sitting                                    | 64.9 (7.9)               | 71.1 (14.1)      | −9.1 (7.5)                     | −2.7 (9.5)       | 0.08                                                                         | 0.001                     |
| Peak exercise heart rate                   | 180.2 (13.2)             | 186.3 (7.5)      | −7.8 (6.0)                     | −8.6 (8.4)       | 0.79                                                                         | 0.0006                    |
| Heart rate recovery at 1 min               | 26.3 (7.9)               | 28.0 (12.6)      | +1.8 (7.6)                     | +3.1 (5.5)       | 0.63                                                                         | 0.42                      |
| Blood pressure (mm Hg)                     |                          |                  |                                |                  |                                                                              |                           |
| Systolic                                   | 121.9 (10.9)             | 121.7 (8.8)      | +6.5 (9.2)                     | −5.6 (6.0)       | 0.0008                                                                       | 0.02                      |
| Diastolic                                  | 69.4 (7.8)               | 72.3 (4.4)       | −0.2 (4.8)                     | −1.8 (5.2)       | 0.42                                                                         | 0.13                      |
| Brachial artery dilatation (%)             |                          |                  |                                |                  |                                                                              |                           |
| Flow-mediated                              | 9.9 (5.2)                | 7.1 (3.6)        | −1.7 (4.0)                     | −0.1 (3.8)       | 0.32                                                                         | 0.23                      |
| Nitroglycerin-mediated                     | 27.8 (8.5)               | 26.1 (6.1)       | −10.2 (6.6)                    | −5.5 (6.9)       | 0.11                                                                         | 0.0002                    |
| Glucose homeostasis                        |                          |                  |                                |                  |                                                                              |                           |
| Fasting insulin (μU/ml) <sup>c</sup>       | 5.06 (4.21)              | 5.49 (4.06)      | +14.3 (23.2)                   | +0.1 (2.6)       | <0.0001                                                                      | <0.0001                   |
| Fasting glucose (mg/dl)                    | 79.2 (8.3)               | 80.1 (7.5)       | +6.8 (14.6)                    | +0.2 (11.7)      | 0.22                                                                         | 0.12                      |
| HOMA <sup>c</sup>                          | 1.03 (0.99)              | 1.10 (0.83)      | +3.5 (6.7)                     | +0.02 (0.6)      | <0.0001                                                                      | <0.0001                   |
| Lipids                                     |                          |                  |                                |                  |                                                                              |                           |
| Triglycerides (mg/dl)                      | 81.2 (26.2)              | 112.8 (75.9)     | +4.8 (25.5)                    | +8.3 (65.7)      | 0.79                                                                         | 0.51                      |
| HDL-cholesterol (mg/dl)                    | 48.1 (6.8)               | 48.7 (14.3)      | +9.8 (8.1)                     | −3.7 (6.3)       | 0.0001                                                                       | 0.0009                    |
| LDL-cholesterol (mg/dl)                    | 100.0 (30.2)             | 105.4 (26.5)     | +1.8 (16.9)                    | −1.1 (9.6)       | 0.60                                                                         | 0.70                      |
| Nonesterified fatty acids (ng/dl)          | 13.6 (4.6)               | 15.2 (4.1)       | +1.7 (1.4)                     | −1.2 (4.7)       | 0.15                                                                         | 0.25                      |
| Sodium/volume homeostasis                  |                          |                  |                                |                  |                                                                              |                           |
| BNP (pg/ml)                                | 6.9 (4.6)                | 8.0 (6.5)        | +7.7 (7.0)                     | −2.9 (7.6)       | 0.001                                                                        | 0.002                     |
| Plasma renin (direct) (μU/ml) <sup>c</sup> | 21.9 (11.9)              | 16.3 (10.2)      | −5.4 (14.8)                    | +7.8 (10.5)      | 0.02                                                                         | 0.20                      |
| Plasma aldosterone (ng/dl) <sup>c</sup>    | 10.4 (4.5)               | 8.9 (4.9)        | −3.0 (2.7)                     | +4.5 (7.0)       | 0.0007                                                                       | 0.001                     |
| Aldosterone:renin ratio (ng/dl ÷ μU/ml)    | 0.52 (0.21)              | 0.60 (0.22)      | −0.07 (0.26)                   | +0.11 (0.43)     | 0.49                                                                         | 0.38                      |
| CRP (mg/liter) <sup>c</sup>                | 0.74 (0.90)              | 0.79 (0.72)      | −0.47 (0.60)                   | −0.19 (0.68)     | 0.04                                                                         | 0.004                     |
| Homocysteine (mg/liter)                    | 1.41 (0.30)              | 1.70 (0.91)      | +0.05 (0.39)                   | −0.15 (0.78)     | 0.43                                                                         | 0.68                      |

The metric-SI conversions are as follows: insulin, 1 μU/ml = 6.945 pmol/liter; glucose, 1 mg/dl = 0.0555 mmol/liter; triglycerides, 1 mg/dl = 0.0113 mmol/liter; HDL-cholesterol and LDL-cholesterol, 1 mg/dl = 0.0259 mmol/liter; BNP, 1 pmol/liter = 3.46 pg/ml; nonesterified fatty acids, 1 mmol/liter = 28.2 ng/dl; homocysteine, 1 mg/liter = 0.135 μmol/liter; aldosterone: 1 ng/dl = 36.1 nmol/liter.

<sup>a</sup> Although means and SD are presented for all parameters, log transformations were performed as appropriate before statistical testing.

<sup>b</sup> *P* values apply to dexamethasone-treated subjects.

<sup>c</sup> Variable log-transformed before analysis.

**TABLE 2.** Pearson correlations (*r*) between indices of HPA-axis tone and cardiovascular biomarkers

| Cardiovascular biomarker                 | Baseline morning cortisol (mean = 15.2 μg/dl; SD = 4.2 μg/dl) | Morning cortisol after 0.5 mg dexamethasone (mean = 5.2 μg/dl; SD = 4.9 μg/dl) | Absolute decrease in cortisol after 0.5 mg dexamethasone (mean = 10.0 μg/dl; SD = 4.7 μg/dl) |
|------------------------------------------|---------------------------------------------------------------|--------------------------------------------------------------------------------|----------------------------------------------------------------------------------------------|
| Age                                      | 0.00                                                          | −0.15                                                                          | −0.16                                                                                        |
| Body mass index                          | −0.14                                                         | −0.35                                                                          | −0.24                                                                                        |
| Waist-to-hip ratio                       | −0.15                                                         | −0.38                                                                          | +0.27                                                                                        |
| Supine heart rate                        | −0.18                                                         | +0.12                                                                          | +0.28                                                                                        |
| Heart rate recovery at 1 min             | +0.08                                                         | +0.10                                                                          | +0.03                                                                                        |
| Systolic blood pressure                  | −0.18                                                         | +0.12                                                                          | +0.28                                                                                        |
| Flow-mediated brachial artery dilatation | −0.21                                                         | +0.03                                                                          | +0.21                                                                                        |
| HOMA                                     | −0.37                                                         | −0.33                                                                          | −0.18                                                                                        |
| Triglycerides                            | +0.23                                                         | +0.04                                                                          | −0.13                                                                                        |
| HDL-cholesterol                          | +0.22                                                         | +0.09                                                                          | −0.11                                                                                        |
| Nonesterified fatty acids                | −0.10                                                         | −0.14                                                                          | −0.07                                                                                        |
| BNP                                      | −0.11                                                         | −0.12                                                                          | −0.04                                                                                        |
| CRP                                      | +0.02                                                         | −0.15                                                                          | −0.19                                                                                        |
| Renin                                    | −0.17                                                         | +0.09                                                                          | −0.23                                                                                        |
| Aldosterone                              | +0.20                                                         | +0.31                                                                          | −0.15                                                                                        |
| Aldosterone:renin ratio                  | +0.41 <sup>a</sup>                                            | +0.23                                                                          | +0.10                                                                                        |

The metric-SI unit conversion for cortisol is 1 μg/dl = 27.6 nmol/liter.

<sup>a</sup> *P* < 0.05; no other *P* values < 0.05.

the observed trend toward a decrease in renin, because renal sympathetic nerves play an important role in stimulating renin release in response to hemodynamic stressors (46). Suppression of ACTH may have further attenuated aldosterone release (47).

We can only speculate about the mechanism of increased blood pressure with dexamethasone, but experimental models suggest that glucocorticoids up-regulate angiotensin II type 1 receptors and  $\alpha$ -1 receptors in vascular smooth muscle, may augment adipocyte production of angiotensinogen, and may stimulate angiotensin-converting enzyme expression, while reducing prostacyclin E2 synthesis at the level of the endothelium and vascular smooth muscle (48–50). The decrease in heart rate that we observed with dexamethasone suggests that increased central sympathetic tone did not contribute to the increase in blood pressure we observed. Similarly, we found no evidence that dexamethasone diminished endothelium-mediated vasodilatation.

The finding that dexamethasone increased BNP *in vivo* contrasts with *in vitro* data demonstrating a decrease in BNP in response to dexamethasone (51). Because dexamethasone does not have significant mineralocorticoid effects (29, 30), BNP increases are not readily explained by direct dexamethasone-induced expansion of plasma volume (52). The absence of a significant relationship between change in BNP and change in blood pressure also argues against increased afterload as the primary mechanism for this finding. It is possible that hyperinsulinemia-induced expansion of plasma volume increased BNP and also led to a compensatory reduction in renin-angiotensin-aldosterone system activity (53). The increase in total body weight that we observed is consistent with this mechanistic hypothesis; the dexamethasone-treated subjects gained an average of 1.3 kg over 5 d, which, if this were fat mass, would require the consumption of approximately 2000 additional kilocalories of food per day, an amount that would likely have been noticed and reported by our subjects (54). It is more than likely, therefore, that this weight gain reflects an increase in total body water, but we do not know how much of this water was intravascular.

The absence of an effect of dexamethasone on endothelial function in our subjects contrasts with data suggesting that glucocorticoids can precipitate endothelial dysfunction via inhibition of endothelial nitric oxide release (22, 55). However, the only published *in vivo* study examining this question used hydrocortisone (22), whose mineralocorticoid effects may have led to endothelial dysfunction (22, 56). It is also possible that longer-term glucocorticoid exposure or a different method of assessing endothelial function might have led to different results.

We identified no relationships between the tone of the HPA axis (as determined by response of cortisol to low-dose dexamethasone) and the cardiovascular risk factors we measured. These findings differ from those of Bjorntorp and colleagues (14, 57), who suggest that a blunted diurnal amplitude of circulating cortisol, and in some cases a blunted response of cortisol to low-dose dexamethasone, may be associated with features of the metabolic syndrome, such as central obesity, hypertension, and dyslipidemia. However, these researchers used a larger sample of patients and studied primarily middle-aged men (rather than healthy young

men). They also measured salivary cortisol rather than serum cortisol. Any of these factors may explain the discrepancies between our findings and theirs. However, we suspect that other measures of glucocorticoid homeostasis, reflecting glucocorticoid activity at the cellular level, are more closely related to the metabolic syndrome than the response of the HPA axis to low-dose dexamethasone (11, 15, 16).

Strengths of our study include its randomized, double-blind, placebo-controlled design and the use of healthy volunteers without active inflammatory disease as our study subjects. On the other hand, our protocol was limited by its short duration of glucocorticoid exposure, and some biomarkers, such as homocysteine, may have exhibited changes had we kept the subjects on glucocorticoid treatment for two or more weeks. However, we believe that longer exposure might have subjected subjects to unnecessary health risk and that any changes in central fat mass precipitated by long-term glucocorticoids might obscure the direct glucocorticoid effects. Our study was also limited by its relatively small size and lack of power to detect subtle changes in the cardiovascular markers we examined. Nevertheless, our study provides further insights regarding the cardiovascular effects of exogenous, and perhaps endogenous, glucocorticoids, clarifying the potential harms and benefits of these ubiquitous compounds.

### Acknowledgments

We thank Cathy Means, Annitta Morehead, Claire E. Pothier, Elizabeth A. Hughes, and Alwin V. Mascharenhas for helping to facilitate data collection and Ed Mascha for his suggestions in refining the study design. We also thank the human subject volunteers who made this study possible.

Received December 7, 2004. Accepted March 7, 2005.

Address all correspondence and requests for reprints to: Daniel J. Brotman, M.D., F.A.C.P., Director, Hospitalist Program, Department of Medicine, Johns Hopkins Hospital, Jefferson 242, 600 North Wolfe Street, Baltimore, Maryland 21287. E-mail: dbrotma1@jhmi.edu.

This work was supported by the Cleveland Clinic Foundation Research Programs Council.

Present address for D.J.B.: Department of Medicine, Johns Hopkins Hospital, Baltimore, Maryland 21287.

### References

1. Munck A, Guyre PM, Holbrook NJ 1984 Physiological functions of glucocorticoids in stress and their relation to pharmacological actions. *Endocr Rev* 5:25–44
2. Burke CW 1985 Adrenocortical insufficiency. *Clin Endocrinol Metab* 14:947–976
3. Yanovski JA, Cutler Jr B 1994 Glucocorticoid action and the clinical features of Cushing's syndrome. *Endocrinol Metab Clin North Am* 23:487–509
4. Friedman TC, Mastorakos G, Newman TD, Mullen NM, Horton EG, Costello R, Papadopoulos NM, Chrousos GP 1996 Carbohydrate and lipid metabolism in endogenous hypercortisolism: shared features with metabolic syndrome X and NIDDM. *Endocr J* 43:645–655
5. Terzolo M, Allasino B, Bosio S, Brusa E, Daffara F, Ventura M, Arosio E, Sacchetto G, Reimondo G, Angeli A, Camaschella C 2004 Hyperhomocysteinemia in patients with Cushing's syndrome. *J Clin Endocrinol Metab* 89:3745–3751
6. Faggiano A, Pivonello R, Spiezia S, De Martino MC, Filippella M, Di Somma C, Lombardi G, Colao A 2003 Cardiovascular risk factors and common carotid artery caliber and stiffness in patients with Cushing's disease during active disease and 1 year after disease remission. *J Clin Endocrinol Metab* 88:2527–2533
7. Colao A, Pivonello R, Spiezia S, Faggiano A, Ferone D, Filippella M, Marzullo P, Cerbone G, Siciliani M, Lombardi G 1999 Persistence of increased cardiovascular risk in patients with Cushing's disease after five years of successful cure. *J Clin Endocrinol Metab* 84:2664–2672

8. **Stambler J, Pick R, Katz L** 1954 Effects of cortisone, hydrocortisone and corticotropin on lipemia, glycemia and atherogenesis in cholesterol-fed chicks. *Circulation* 10:237–246
9. **Wei L, MacDonald TM, Walker BR** 2004 Taking glucocorticoids by prescription is associated with subsequent cardiovascular disease. *Ann Intern Med* 141:764–770
10. **Doria A, Shoefeld Y, Wu R, Gambari PF, Puato M, Ghirardello A, Gilburd B, Corbanese S, Patnaik M, Zampieri S, Peter JB, Favaretto E, Iaccarino L, Sherer Y, Todesco S, Pauletto P** 2003 Risk factors for subclinical atherosclerosis in a prospective cohort of patients with systemic lupus erythematosus. *Ann Rheum Dis* 62:1071–1077
11. **Girod JP, Brotman DJ** 2004 Does altered glucocorticoid homeostasis increase cardiovascular risk? *Cardiovasc Res* 64:217–226
12. **Chrousos GP** 2004 The glucocorticoid receptor gene, longevity, and the complex disorders of Western societies. *Am J Med* 117:204–207
13. **van Rossum EF, Feelders RA, van den Beld AW, Uitterlinden AG, Janssen JA, Ester W, Brinkmann AO, Grobbee DE, de Jong FH, Pols HA, Koper JW, Lamberts SW** 2004 Association of the ER22/23EK polymorphism in the glucocorticoid receptor gene with survival and C-reactive protein levels in elderly men. *Am J Med* 117:158–162
14. **Bjorntorp P, Holm G, Rosmond R** 1999 Hypothalamic arousal, insulin resistance and type 2 diabetes mellitus. *Diabet Med* 16:373–383
15. **Bujalska IJ, Kumar S, Stewart PM** 1997 Does central obesity reflect “Cushing’s disease of the omentum”? *Lancet* 349:1210–1213
16. **Whorwood CB, Donovan SJ, Flanagan D, Phillips DI, Byrne CD** 2002 Increased glucocorticoid receptor expression in human skeletal muscle cells may contribute to the pathogenesis of the metabolic syndrome. *Diabetes* 51:1066–1075
17. **Reynolds RM, Walker BR, Syddall HE, Andrew R, Wood PJ, Whorwood CB, Phillips DI** 2001 Altered control of cortisol secretion in adult men with low birth weight and cardiovascular risk factors. *J Clin Endocrinol Metab* 86:245–250
18. **Reynolds RM, Chapman KE, Seckl JR, Walker BR, McKeigue PM, Lithell HO** 2002 Skeletal muscle glucocorticoid receptor density and insulin resistance. *JAMA* 287:2505–2506
19. **Giugliano GR, Giugliano RP, Gibson CM, Kuntz RE** 2003 Meta-analysis of corticosteroid treatment in acute myocardial infarction. *Am J Cardiol* 91:1055–1059
20. **Zimmerman J, Fainaru M, Eisenberg S** 1984 The effects of prednisone therapy on plasma lipoproteins and apolipoproteins: a prospective study. *Metabolism* 33:521–526
21. **Ettlinger Jr WH, Hazzard WR** 1988 Prednisone increases very low density lipoprotein and high density lipoprotein in healthy men. *Metabolism* 37:1055–1058
22. **Mangos GJ, Walker BR, Kelly JJ, Lawson JA, Webb DJ, Whitworth JA** 2000 Cortisol inhibits cholinergic vasodilation in the human forearm. *Am J Hypertens* 13:1155–1160
23. **Taskinen MR, Kuusi T, Yki-Jarvinen H, Nikkila EA** 1988 Short-term effects of prednisone on serum lipids and high density lipoprotein subfractions in normolipidemic healthy men. *J Clin Endocrinol Metab* 67:291–299
24. **Bruno A, Carucci P, Cassader M, Cavallo-Perin P, Gruden G, Olivetti C, Pagano G** 1994 Serum glucose, insulin and C-peptide response to oral glucose after intravenous administration of hydrocortisone and methylprednisolone in man. *Eur J Clin Pharmacol* 46:411–415
25. **Haggendal E, Lindfors M, Lundberg D** 1978 The adrenergic mechanism of the haemodynamic effects of massive doses of hydrocortisone in controlled haemorrhagic shock in the dog. *Acta Anaesthesiol Scand* 22:208–214
26. **Kalsner S** 1969 Mechanism of hydrocortisone potentiation of responses to epinephrine and norepinephrine in rabbit aorta. *Circ Res* 24:383–395
27. **Macefield VG, Williamson PM, Wilson LR, Kelly JJ, Gandevia SC, Whitworth JA** 1998 Muscle sympathetic vasoconstrictor activity in hydrocortisone-induced hypertension in humans. *Blood Press* 7:215–222
28. **Yasuda K, Hines 3rd E, Kitabchi AE** 1982 Hypercortisolism and insulin resistance: comparative effects of prednisone, hydrocortisone, and dexamethasone on insulin binding of human erythrocytes. *J Clin Endocrinol Metab* 55:910–915
29. **Funder JW** 1992 Glucocorticoid receptors. *J Steroid Biochem Mol Biol* 43:389–394
30. **Lombes M, Claire M, Lustenberger P, Michaud A, Rafestin-Oblin ME** 1987 A new affinity matrix for mineralocorticoid receptors. *J Biol Chem* 262:8121–8127
31. **Cooper MS, Stewart PM** 2003 Corticosteroid insufficiency in acutely ill patients. *N Engl J Med* 348:727–734
32. **Mahgoub A, Hirsch PF, Munson PL** 1997 Calcium-lowering action of glucocorticoids in adrenalectomized-parathyroidectomized rats. Specificity and relative potency of natural and synthetic glucocorticoids. *Endocrine* 6:279–283
33. **Ganapathi MK, Rzewnicki D, Samols D, Jiang SL, Kushner I** 1991 Effect of combinations of cytokines and hormones on synthesis of serum amyloid A and C-reactive protein in Hep 3B cells. *J Immunol* 147:1261–1265
34. **Rosmond R, Dallman MF, Bjorntorp P** 1998 Stress-related cortisol secretion in men: relationships with abdominal obesity and endocrine, metabolic and hemodynamic abnormalities. *J Clin Endocrinol Metab* 83:1853–1859
35. **Wallace TM, Levy JC, Matthews DR** 2004 Use and abuse of HOMA modeling. *Diabetes Care* 27:1487–1495
36. **Panzer C, Lauer MS, Brieke A, Blackstone E, Hoogwerf B** 2002 Association of fasting plasma glucose with heart rate recovery in healthy adults: a population-based study. *Diabetes* 51:803–807
37. **Cole CR, Blackstone EH, Pashkow FJ, Snader CE, Lauer MS** 1999 Heart-rate recovery immediately after exercise as a predictor of mortality. *N Engl J Med* 341:1351–1357
38. **Imai K, Sato H, Hori M, Kusuoka H, Ozaki H, Yokoyama H, Takeda H, Inoue M, Kamada T** 1994 Vagally mediated heart rate recovery after exercise is accelerated in athletes but blunted in patients with chronic heart failure. *J Am Coll Cardiol* 24:1529–1535
39. **Brown NJ** 2003 Eplerenone: cardiovascular protection. *Circulation* 107:2512–2518
40. **Rivellese AA, Patti L, Romano G, Innelli F, Di Marino L, Annuzzi G, Iavicoli M, Coronel GA, Riccardi G** 2000 Effect of insulin and sulfonylurea therapy, at the same level of blood glucose control, on low density lipoprotein subfractions in type 2 diabetic patients. *J Clin Endocrinol Metab* 85:4188–4192
41. **Ettlinger WH, Goldberg AP, Applebaum-Bowden D, Hazzard WR** 1987 Dyslipoproteinemia in systemic lupus erythematosus. Effect of corticosteroids. *Am J Med* 83:503–508
42. **Hennes MM, O’Shaughnessy IM, Kelly TM, LaBelle P, Egan BM, Kissebah AH** 1996 Insulin-resistant lipolysis in abdominally obese hypertensive individuals. Role of the renin-angiotensin system. *Hypertension* 28:120–126
43. **Yusuf S, Gerstein H, Hoogwerf B, Pogue J, Bosch J, Wolfenbutter BH, Zinman B** 2001 Ramipril and the development of diabetes. *JAMA* 286:1882–1885
44. **Reaven GM, Lithell H, Landsberg L** 1996 Hypertension and associated metabolic abnormalities: the role of insulin resistance and the sympathoadrenal system. *N Engl J Med* 334:374–381
45. **Arlt J, Jahn H, Kellner M, Strohle A, Yassouridis A, Wiedemann K** 2003 Modulation of sympathetic activity by corticotropin-releasing hormone and atrial natriuretic peptide. *Neuropeptides* 37:362–368
46. **Nelson LD, Osborn JL** 1993 Neurogenic control of renal function in response to graded nonhypotensive hemorrhage in conscious dogs. *Am J Physiol* 264:R661–R667
47. **Daidoh H, Morita H, Mune T, Murayama M, Hanafusa J, Ni H, Shibata H, Yasuda K** 1995 Responses of plasma adrenocortical steroids to low dose ACTH in normal subjects. *Clin Endocrinol (Oxf)* 43:311–315
48. **Gorzelnik K, Engeli S, Janke J, Luft FC, Sharma AM** 2002 Hormonal regulation of the human adipose-tissue renin-angiotensin system: relationship to obesity and hypertension. *J Hypertens* 20:965–973
49. **Aubert J, Darimont C, Safonova I, Ailhaud G, Negrel R** 1997 Regulation by glucocorticoids of angiotensinogen gene expression and secretion in adipose cells. *Biochem J* 328:701–706
50. **Ullian ME** 1999 The role of corticosteroids in the regulation of vascular tone. *Cardiovasc Res* 41:55–64
51. **Itoh H, Sagawa N, Hasegawa M, Inamori K, Ueda H, Kitagawa K, Nanno H, Ihara Y, Kobayashi F, Mori T** 1994 Transforming growth factor- $\beta$  stimulates, and glucocorticoids and epidermal growth factor inhibit brain natriuretic peptide secretion from cultured human amnion cells. *J Clin Endocrinol Metab* 79:176–182
52. **Pirpiris M, Sudhir K, Yeung S, Jennings G, Whitworth JA** 1992 Pressor responsiveness in corticosteroid-induced hypertension in humans. *Hypertension* 19:567–574
53. **Norgaard K, Jensen T, Skott P, Thorsteinsson B, Bruun NE, Giese J, Feldt-Rasmussen B** 1991 Effects of insulin on renal haemodynamics and sodium handling in normal subjects. *Scand J Clin Lab Invest* 51:367–376
54. **National Institutes of Health National Heart, Lung, and Blood Institute and the North American Association for the Study of Obesity** 2000 Practical guide identification, evaluation and treatment of overweight and obesity in adults. Pub. No. 00-4084. Washington, DC: National Institutes of Health
55. **Iuchi T, Akaike M, Mitsui T, Ohshima Y, Shintani Y, Azuma H, Matsumoto T** 2003 Glucocorticoid excess induces superoxide production in vascular endothelial cells and elicits vascular endothelial dysfunction. *Circ Res* 92:81–87
56. **Farquharson CA, Struthers AD** 2002 Aldosterone induces acute endothelial dysfunction in vivo in humans: evidence for an aldosterone-induced vasculopathy. *Clin Sci (Lond)* 103:425–431
57. **Rosmond R, Bjorntorp P** 2000 The hypothalamic-pituitary-adrenal axis activity as a predictor of cardiovascular disease, type 2 diabetes and stroke. *J Intern Med* 247:188–197
